# Supplementary material for: Finnish Subacromial Impingement Arthroscopy Controlled Trial (FIMPACT): a protocol for a randomised trial comparing arthroscopic subacromial decompression and diagnostic arthroscopy (placebo control), with an exercise therapy control, in the treatment of shoulder impingement syndrome
Source: PubMed Central journal article supplement — BMJ Open. 2017 Jun 6;7(5):e014087. doi: 10.1136/bmjopen-2016-014087 (PMC5734212; doi:10.1136/bmjopen-2016-014087), 2017-06-06
Supplement: bmjopen-2016-014087supp001.pdf [file bmjopen-2016-014087supp001.pdf]

## Supplementary Web Appendix

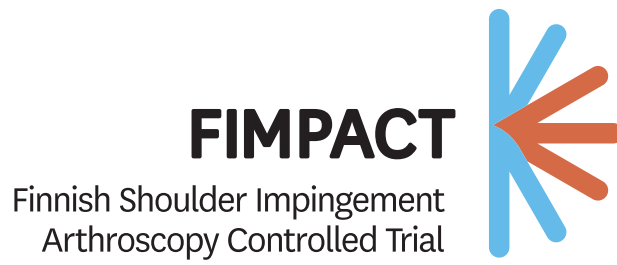

### Table of Contents

|                                                  |    |
|--------------------------------------------------|----|
| Informed Consent Form (in Finnish).....          | 2  |
| Patient Satisfaction to the Treatment Given..... | 7  |
| Statistical Analysis Plan (SAP).....             | 8  |
| Blinded Data Interpretation Plan.....            | 22 |

## Informed Consent Form (in Finnish)

### AHDAS OLKAPÄÄ -OIREYHTYMÄ-TUTKIMUS

R04200

päiv. 16.11.2011

#### POTILASTIEDOTE

Vertaileva tutkimus leikkaushoidon ja ei-leikkaushoidon vaikuttavuudesta ahdas olkapää-oireyhtymän (ns. impingement-syndrooma) hoidossa Hatanpään, Jorvin ja Herttoniemen sairaaloissa.

Hyvä potilas,

Teillä on todettu ahdas olkapää-oireyhtymä. Vaivan syynä on ajateltu olevan olkaluun pään ja olkalisäkkeen välinen ahtaus, joka puolestaan arvioidaan johtuvan rappeutuman aiheuttamista ahtauttavista muutoksista ja olkapään lihasvoimien ja lihastasapainon heikentymisestä johtuvasta olkaluun siirtymisestä ylöspäin.

Ahdas olkapää-oireyhtymää voidaan hoitaa joko ei-leikkauksellisesti (kuntoutus) tai leikkauksella. Perinteisesti ei-leikkauksellinen hoito toteutetaan käyttäen lepoa, olkalisäkkeen alaisia kortikosteroidipistoksia, kylmähoitoa, tulehduskipulääkettä ja fysioterapiaa. Leikkaushoitona taas käytetään olkalisäkkeen osittaista poistoa joko avoleikkauksella tai tähystyksessä. Leikkaushoitoon yhdistetään yleensä olkanivelen tähystystutkimus.

Ahdas olkapää-oireyhtymän perimmäiset syyt ja kipua aiheuttavat mekanismit ovat huonosti tunnetut. Hoitolinjan on ratkaissut pikemmin vakiintuneet hoitokäytännöt kuin tutkimuksellisesti osoitettu tietämys vaivan hoidosta. Alkuvaiheessa vaivaa on hoidettu ei-leikkauksellisesti kuormituksen vähentämisellä (lepo, sairasloma) ja kivun lievityksellä lääkehoidoin. Tehokasta pitkäaikaista lihaskuntoharjoittelua on harvoin kokeiltu. Mikäli ei-leikkauksellinen hoito ei ole tehonnut 3 kuukauden kuluessa, on usein päädytty leikkauksella tehtävään olkalisäkkeen osittaiseen poistoon. Tähystystutkimuksen yhteydessä tehtävä olkalisäkkeen osittainen poisto on todettu vertailevissa tutkimuksissa vähintään avoleikkauksen veroiseksi, mutta leikkaushoidon tehoa ei ole verrattu kuntoutuksen tehoon. Lisäksi leikkaushoitoon liittyy aina leikkauskomplikaatioiden riski, joista leikkausalueen bakteeritulehdus on yleisin.

Olemme käynnistäneet tutkimuksen, jossa selvitämme ahdas olkapää-oireyhtymän hoitojen vaikuttavuutta ja hyödyllisyyttä. Teillä on tutkimukseemme soveltuva ahdas olkapää-oireyhtymä ja pyydämme Teitä

osallistumaan tutkimukseemme. Teidät arvotaan tutkimukseemme lihaskuntoutusryhmään, leikkauksellisesti tehtävään olkalisäkkeen osapoiston ryhmään tai leikkaukselliseen olkapään pelkkään tähystystutkimusryhmään. Hoidon alkamista edeltää olkapään magneettitutkimus, ja mikäli siinä havaitaan jokin muu olkapääkipuunne selvittävä vaiva kuin ahdas olkapää-oireyhtymä, Teitä ei voida ottaa tutkimukseemme. Luonnollisesti teille kuitenkin järjestetään tämän todetun vaivan hoito.

Mikäli arvonta osoittaa teidät ei-leikkaukselliseen hoitoryhmään, teille aloitetaan 3 kuukauden ohjattu lihaskuntoharjoittelu, joka toteutetaan fysioterapeutin kanssa toteutettavalla 15 harjoittelukäynnillä ja itsenäisesti toteutettavin harjoittein. Fysioterapiakäynnit ovat teille maksuttomia. Hoidon alkuun teille määrätään sairausloma mikäli tilanteenne sitä edellyttää.

Mikäli teidät arvotaan leikkaukselliseen olkalisäkkeen osapoistoryhmään, saatte leikkausajan olkanivelen tähystykseen ja tähystyksen yhteydessä tapahtuvaan olkalisäkkeen osittaiseen poistamiseen. Toimenpide suoritetaan yleisanestesiassa (ns. nukutus) ja kotiudutte ensimmäisenä leikkauksen jälkeisenä päivänä noin vuorokauden sairaalaseurannan jälkeen. Mikäli toimenpiteenne toteutetaan päiväkirurgisena hoitona, on mahdollista, että pääsette kotiin jo operaatiopäivänä. Toimenpiteen jälkeen operoitua yläraajaa tulee pitää kantositeessä noin vuorokauden ajan. Leikkaushoitoa seuraa 4-6 viikon sairausloma ja 6 viikon kuluttua toimenpiteestä on jälkitarkastus poliklinikalla.

Mikäli teidät sitä vastoin arvotaan olkapään tähystysryhmään, saatte ajan toimenpiteeseen, jossa teille tehdään ainoastaan olkanivelen tähystys, mutta ei olkalisäkkeen osapoistoa. Mikäli tähystyksessä kuitenkin havaitaan olkapäävaivaanne selvittäviä rakenteellisia muutoksia (esim. kiertäjäkalvosimen repeämä), ne hoidetaan vallitsevien periaatteiden mukaisesti samassa leikkauksessa. Toimenpide suoritetaan yleisanestesiassa (ns. nukutus) ja kotiudutte ensimmäisenä leikkauksen jälkeisenä päivänä noin vuorokauden sairaalaseurannan jälkeen. Mikäli toimenpiteenne toteutetaan päiväkirurgisena hoitona, on mahdollista, että pääsette kotiin jo operaatiopäivänä. Toimenpiteen jälkeen operoitua yläraajaa tulee pitää kantositeessä noin vuorokauden ajan. Leikkaushoitoa seuraa 4-6 viikon sairausloma ja 6 viikon kuluttua toimenpiteestä on jälkitarkastus poliklinikalla.

Mikäli teidät arvotaan jompaankumpaan hoitoryhmistä, jossa ei suoriteta olkalisäkkeen osapoistoa ja olette 6 kuukautta hoidon aloittamisesta edelleen tyytymätön ahdas olkapää-oireyhtymänne hoitotulokseen, Teillä on mahdollisuus päästä viipymättä olkalisäkkeen tähystykselliseen osapoistoleikkaukseen.

Kaikissa hoitoryhmissä paranemista seurataan säännöllisin maksuttomin käynnein hoidostanne vastaavan sairaalan poliklinikalla 6 kuukautta, sekä **2, 5 ja 10 vuotta hoidon aloittamisen jälkeen**. Joka käynnin yhteydessä Teille tehdään tilannettanne ja olkapäännne kuntoutumista kartoittava kysely ja toimintakykytesti. Lisäksi tilannettanne kartoitetaan puhelimitse ja kotiin postitettavin kyselyin 3 kuukautta ja 12 kuukautta hoidon aloittamisen jälkeen.

Mikäli ette ole tyytyväinen tutkimuksessa seurattavan olkanivelenne tilanteeseen tai Teille tulee kysyttävää tutkimuksesta, voitte ottaa yhteyttä tämän potilastiedotteen lopussa mainittuun tutkimuksen yhteyshenkilöön.

Tutkimukseen osallistuminen antaa tärkeää tietoa ahdas olkapää-oireyhtymän hoidosta ja tulokset tullaan julkaisemaan kansainvälisissä lääketieteen alan julkaisuissa. Tutkimukseen osallistuminen on vapaaehtoista, eikä siitä kieltäytyminen vaikuta nykyisiin tai tuleviin hoitoihinne. Halutessanne voitte keskeyttää osallistumisenne tutkimukseen milloin tahansa. Tutkimuksen osallistuminen ei aiheuta teille vaaraa ja tutkimukseen osallistuessanne kuulutte normaaliin potilasvakuutuksen piiriin. Tutkimuksen yhteydessä saatte palautetta parantumisesta suoraan tutkivilta lääkäreiltä.

Terveisin,

Terveisin,

Kari Kanto

Ortopedi, erikoislääkäri

Tampereen kaupunki

Hatanpään sairaala

Pirjo Toivonen

tutkimushoitaja

Hatanpään sairaala

puh. 03-565 72827

[pirjo.h.toivonen@tampere.fi](mailto:pirjo.h.toivonen@tampere.fi)

## Ahdas olkapää-oireyhtymän hoitoa käsittelevä tutkimus (ETL-koodi R04200)

Minua on pyydetty osallistumaan yllä mainittuun tieteelliseen tutkimukseen ja olen saanut sekä kirjallista että suullista tietoa tutkimuksesta ja mahdollisuuden esittää siitä tutkijoille kysymyksiä.

Suostun osallistumaan yllä mainittuun tutkimukseen.

Ymmärrän, että tutkimukseen osallistuminen on vapaaehtoista ja että minulla on oikeus kieltäytyä siitä sekä perua suostumukseni milloin tahansa syytä ilmoittamatta. Ymmärrän myös, että tiedot käsitellään luottamuksellisesti.

Ahdas olkapää-oireyhtymäni hoitoa käsitteleviä tietoja voi tutkimusta varten pyytää seuraavista paikoista:

- Kansaneläkelaitos (Kela)
- Terveyden- ja hyvinvoinnin laitos (THL)
- Muut sairaalat
- Muut hoitolaitokset (esim. yksityislääkäriasemat)

Paikka ja pvm

\_\_\_\_\_. \_\_\_\_\_. 20\_\_\_\_

\_\_\_\_\_

tutkittavan allekirjoitus

\_\_\_\_\_

Paikka ja pvm

\_\_\_\_\_. \_\_\_\_\_. 20\_\_\_\_

\_\_\_\_\_

suostumuksen vastaanottajan allekirjoitus

\_\_\_\_\_

nimenselvennys

nimenselvennys

---

henkilötunnus tai syntymäaika

---

osoite

## Patient Satisfaction to the Treatment Given

How satisfied are you with the treatment given? Mark the answer closest to your situation.

1. Very satisfied, my shoulder has healed completely.
2. Satisfied, I have only minor, activity related symptoms. My shoulder is much better than before treatment.
3. Somewhat satisfied, i have only minor symptoms. My shoulder is better than before treatment.
4. Dissatisfied, my shoulder is the same as before treatment.
5. Very dissatisfied, my shoulder is worse than before treatment.

## Statistical Analysis Plan (SAP)

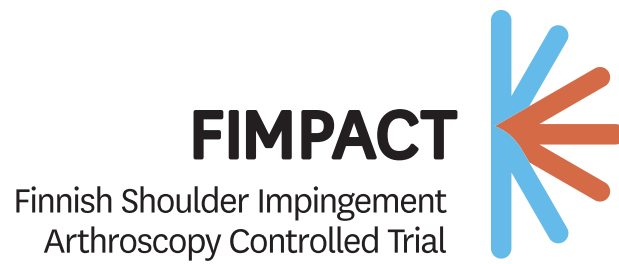

### **Finnish Subacromial Impingement Arthroscopy Controlled Trial (FIMPACT), 2-year follow-up**

Simo Taimela<sup>1</sup> and Teppo L N Järvinen<sup>1</sup>

Statistical advisor:

Jonas Ranstam

<sup>1</sup> Department of Orthopedics and Traumatology, Helsinki University Central Hospital and University of Helsinki, Helsinki, Finland



## **STUDY SYNOPSIS**

**Introduction:** Arthroscopic subacromial decompression (ASD) is the most commonly performed surgical intervention for shoulder pain, yet evidence on its efficacy is limited. The rationale for the surgery rests on the tenet that symptom relief is achieved through removal of a bony acromial spur and the resulting decompression of the tendon passage. Acknowledging the potential placebo effect of surgery, the primary objective of this superiority trial is to compare the efficacy of ASD versus diagnostic arthroscopy (DA) in patients with shoulder impingement syndrome (SIS), where DA differs only by the lack of subacromial decompression. As a non-surgical treatment option, a third group of supervised progressive exercise therapy (ET) will allow for pragmatic assessment of the relative benefits of surgical vs. non-operative treatment strategies.

**Methods/Design:** FIMPACT trial is an ongoing multicentre, three-group randomised controlled study with a primary objective of assessing the efficacy of the ASD vs. DA and a secondary objective of comparing ASD to exercise therapy (ET) in a pragmatic setting. We performed two-fold concealed allocation, first by randomizing patients to surgical (ASD or DA) or conservative (ET) treatment in 2:1 ratio and then those allocated to surgery further to ASD or DA in 1:1 ratio. Our two primary outcomes are pain at rest and arm activity assessed with visual analog scale (VAS), while the secondary outcomes are functional assessment (Constant score and Simple shoulder test), quality of life (15D and SF-36), patient satisfaction, proportions of responders and non-responders, reoperations/treatment conversions, all at 2 years post-randomization, as well as adverse effects and complications. We recruited a total of 210 patients from 3 tertiary referral centres. We will conduct the primary analysis on the intention-to-treat basis.

## **TRIAL REGISTRATION**

ClinicalTrials.gov NCT00428870 (first registered January 29, 2007).

## **STUDY OBJECTIVES AND OUTCOMES**

This statistical analysis plan (SAP) is accompanying the actual study protocol of the FIMPACT trial, a document that elaborates the methods used in detail. All outcomes were inquired from participants at baseline and follow-ups (6 and 24 months) and selected additional measures at 3 and 12 months (for details, see Table 1). The last patient reached the primary endpoint, the 24-month follow-up, in September 2015.

**Table 1: Outcomes and follow-up time points**

| Assessment                                      | Screening | Enrolment (Baseline) | Surgery | 3 Months | 6 Months | 12 Months | 24 Months | 5 years | 10 years |
|-------------------------------------------------|-----------|----------------------|---------|----------|----------|-----------|-----------|---------|----------|
| Screening form                                  | X         |                      |         |          |          |           |           |         |          |
| Informed consent                                |           | X                    |         |          |          |           |           |         |          |
| Baseline characteristics form                   |           | X                    |         |          |          |           |           |         |          |
| X-ray and MRI                                   | X         |                      |         |          |          |           |           |         | X        |
| Randomisation                                   |           | X (1st)              | X (2nd) |          |          |           |           |         |          |
| Arthroscopic findings form                      |           |                      | X       |          |          |           |           |         |          |
| Follow-up form*                                 |           |                      |         | X        |          | X         |           |         |          |
| Clinical examination                            |           | X                    |         |          | X        |           | X         | X       | X        |
| Complications/adverse effects form**            |           |                      | (X)     | (X)      | (X)      | (X)       | (X)       | (X)     | (X)      |
| VAS, at rest                                    |           | X                    |         | X        | X        | X         | X         | X       | X        |
| VAS, at arm activity                            |           | X                    |         | X        | X        | X         | X         | X       | X        |
| Constant- Murley Score                          |           | X                    |         |          | X        |           | X         | X       | X        |
| Simple Shoulder Test (SST)                      |           | X                    |         |          | X        |           | X         | X       | X        |
| SF-36                                           |           | X                    |         | X        | X        | X         | X         | X       | X        |
| 15D                                             |           | X                    |         | X        | X        | X         | X         | X       | X        |
| Return to work                                  |           |                      |         | X        | X        | X         | X         | X       | X        |
| Return to previous leisure activities           |           |                      |         | X        | X        | X         | X         | X       | X        |
| Responder analysis                              |           |                      |         | X        | X        | X         | X         | X       | X        |
| Patients satisfaction to the treatment          |           |                      |         | X        | X        | X         | X         | X       | X        |
| Patients assessment of the treatment allocation |           |                      |         | X        |          |           |           |         |          |
| Health resource utilization                     |           |                      |         | X        | X        | X         | X         | X       | X        |

\* Letter/telephone interview

\*\* If required

### DESCRIPTIVE OUTCOMES

At screening, the participants filled out a questionnaire to record gender, age, hand dominance, weight, height, level of education (socioeconomic status), workload (type of work), physical activity level, sports discipline, subjective health, symptoms (onset, frequency, and severity), use of pain medications, prior treatments, expectations to treatment, generic health state, and disease-specific scores. To exclude patients with concomitant shoulder pathology (particularly rotator cuff rupture), magnetic resonance imaging with contrast (MRA) was acquired for each participant.

### OBJECTIVES AND PRIMARY OUTCOME

The primary objective of this trial is to compare the efficacy of arthroscopic subacromial

decompression (ASD) versus diagnostic arthroscopy (DA) in patients with SIS. The trial is designed as a superiority trial, i.e. we expected in the power calculation that the ASD will result in greater pain relief at 24-month follow-up than DA (or ET). The 24-month follow-up was chosen as the primary endpoint, since this time point is a commonly held “minimal requirement” for any procedure in the field (orthopaedics) and most commonly used in the trials assessing the treatment of SIS.

The primary hypothesis: The primary hypothesis of our FIMPACT trial is that ASD is superior to DA in patients with SIS.

To enable pragmatic assessment of the relative benefits of surgical vs. non-operative treatment strategies on SIS, a non-surgical (third) treatment option of supervised progressive exercise therapy (ET) is also included (ASD vs. ET).

**Additional hypothesis: The relative benefits of ASD and ET will be assessed without a priori hypothesis on the superiority of one or the other.**

As the primary outcome measure, a visual analogue scale (0-100) was used to measure the patient’s perceived pain intensity at rest and at arm activity during the 24 hours preceding the assessment. We considered 15 as the minimal clinically important difference (MCID) for SIS.<sup>1</sup>

## **SECONDARY OUTCOMES**

Our secondary outcome measures are listed below. These outcomes will only be supportive, explanatory and/or hypothesis generating, which is why multiplicity is not considered to be a problem<sup>2</sup>.

### **Constant-Murley score**

Constant-Murley score (CS) is the most commonly used scoring system for evaluation of various disorders of the shoulder<sup>3</sup>. It consists of both objective (range of motion and strength) and subjective measurements (pain assessment, work load, and leisure time activities), which are summarized in a score between 0 and 100. A higher score indicates better shoulder function. The minimal detectable change (MDC) of the Constant score is 17 for patients with SIS<sup>4</sup>

In addition, as night pain is considered one of the hallmark symptoms in patients with SIS and our two primary outcome measures (patient’s perceived pain intensity at rest and at arm activity in the

last 24 hours) do not specifically address this issue, a specific question from the Constant-Murley score (unaffected sleep: “Yes” or “No”) will be analysed separately.

## **SST**

The simple shoulder test (SST) was developed to assess any impairment of the patient’s activities of daily living<sup>5</sup>. The SST consists of 12 questions with yes (1) or no (0) response options. The maximum SST score is 12 indicating normal shoulder function, minimum score of 0 points refers severely diminished shoulder function. The SST has good reliability and responsiveness in patients with rotator cuff symptoms<sup>6</sup>. The MCID for the SST in rotator cuff disease is 2 points<sup>7</sup>.

## **15D**

The 15D instrument is a generic health-related quality of life (HRQoL) instrument comprising 15 dimensions<sup>8</sup>. For each dimension, the respondent must choose one of the five levels that best describes his/her state of health at that the moment (the best level being 1 and the worst level being 5). A set of utility or preference weights is used in an addition aggregate formula to generate a single index number, the utility or 15D score. The maximum 15D score is 1 (no problems on any dimension) and the minimum score is 0 (being dead). The responsiveness, reliability and validity of 15D have been thoroughly established, and this instrument has been used extensively in clinical and healthcare research<sup>9 10</sup>.

## **SF-36**

Short form or SF-36 is a generic HRQoL instrument to quantify the physical, functional, and psychological aspects of health-related quality of life. It consists of 36 questions in eight subscales that assess physical, functional, social, and psychological well-being<sup>11</sup>. Score ranges from 0 to 100, where a higher score is associated with better health. The physical and mental component summary scales (PCS and MCS, respectively) are then calculated as composites of the related subscales. SF-36 is one of most widely used measure of health-related quality of life<sup>12</sup>.

## **Patient satisfaction and Responder analysis**

We elicited patients’ global assessment of satisfaction to the treatment with this question: “Are you

satisfied with the treatment you have received?” We used a VAS scale ranging from 0 (completely disappointed) to 100 (completely satisfied).

Additionally, we elicited patient satisfaction to the treatment outcome with the following question at each follow-up time point (Table 1): “How satisfied are you with the outcome of your treatment?” on a 5-item scale. Participants who reported very satisfied or satisfied will be categorized as “Responders” and patients who responded very dissatisfied or dissatisfied as “Non-responders”.

### **Return to previous leisure activities**

Similarly, at each follow-up (Table 1), participants were asked to respond to the following question: “Have you been able to return to your previous leisure activities?” (“yes” or “no”).

### **Patients’ perception of operative treatment-group assignment**

At the 3-month follow-up point, the patients in the two operative groups were asked to guess whether they had undergone ASD or DA.

### **Health resource utilization and costs**

For the cost-effectiveness analysis, at each follow-up visit the participants were asked to fill in a questionnaire inquiring about the use of healthcare resources. The questionnaire contains a list of items of healthcare resources available and the participants were asked to fill in the number of visits per item during the recall period of each follow-up time point. The resource use will be calculated based on the number of visits times unit cost per item and expressed as mean costs by items of resource use, and the mean direct total health care resource costs. All costs will be discounted to the 2016 price level.

### **Time to return to work**

Information about return to work was recorded at each follow-up time point (Table 1).

### **Complications and adverse effects**

Complications directly related to the interventions were registered. The participants were also

encouraged to contact the participating hospitals if any adverse effects occurred and contacts to the health care system were monitored at every follow-up visit. Potential adverse effects (AE) were categorized to serious adverse effects (SAE) and minor adverse effects (MAE) if the participants sought treatment. Death, cardio-vascular or gastrointestinal effects, deep venous thrombosis, pulmonary embolism, systemic or local infection were categorised as SAEs and shoulder symptoms like pain, swelling and decreased range of motion were categorised as MAEs. The number and severity of complications and adverse effects will be assessed.

## **EXPLORATORY OUTCOMES**

We have identified three potentially important effect modifying factors. We will perform subgroup analyses with the primary endpoint as the outcome and the direction of hypothesized effect described as below<sup>14</sup>.

### **Duration of symptoms**

We will compare the treatment effects stratified based on the duration of symptoms (those with < 6/12 months vs. those > 6/12 months). We hypothesize that subacromial decompression will work better in patients with duration of symptoms > 6 months than for patients with symptoms < 6 months.

### **Severity of symptoms**

We will compare the treatment effects in patients with severe (VAS 70 or more), moderate (VAS 55 to 69), and mild (VAS less than 55) symptoms at baseline. We hypothesize that subacromial decompression will work better in patients with more severe (VAS 70 or more) than moderate (VAS 55 to 69) or mild (VAS less than 55) symptoms at baseline.

### **Acromial anatomy**

We will compare the treatment effects in patients with flat (type I), curved (type II), or hooked (type III) acromion according to classification by Bigliani et al.<sup>15</sup> We hypothesize that subacromial decompression will work better in patients with hooked (type III) than curved (type II) or flat (type I) acromion at baseline.

## **STUDY DESIGN**

### **Sample size**

The sample size calculation was based on the two primary outcome measures, VAS at rest and at arm activity, at 24 months post randomization. FIMPACT trial was powered to detect a minimal clinically important improvement (MCII) in a VAS pain score (improvement of at least 15; assumed standard deviation 25) between ASD and DA (or ET). To achieve a somewhat unconventional (stringent) 90% study power and using a two-sided Type I error rate (5%), our trial requires 68 patients per study group to show clinically meaningful advantage of ASD over DA (or ET). Acknowledging the stringent power threshold, only 3% surplus was reserved for potential loss to follow up/crossovers (3%), and accordingly, the recruitment target was set at 70 patients per treatment group.

### **Randomization and blinding**

To obtain three balanced study groups (of similar group size), we performed a two-fold, sequential randomization. In Phase I, the participants were randomized into non-surgical or surgical treatment with allocation ratio 1:2. In the Phase II, those allocated to surgical treatment were further randomized to ASD or DA with 1:1 ratio. An independent statistician with no clinical involvement in the execution of the trial prepared separate randomization lists for each study centre using a computer-generated algorithm. Randomization was carried out using sequentially numbered sealed opaque envelopes. The envelopes were kept in a secure, agreed location at each centre. To ensure concealment, block randomization was applied using blocks varying in size randomly, the block size known only by the statistician.

To initially enter a participant into the study (Phase I), an envelope containing the treatment assignment [non-surgical (ET) or surgery (ASD or DA), ratio 1:2] was opened during the baseline appointment. Participants randomized to ET started standardized physiotherapy within 2 weeks of the baseline appointment. Participants allocated to surgical treatment were scheduled for surgery aimed to be completed within 12 weeks of randomization.

At the day of surgery, an arthroscopic examination was first carried out to confirm the eligibility of the participant (to rule out full-thickness RC tear and other obvious intra-articular pathology). Research/staff nurse then completed the randomization procedure (Phase II) by opening an

envelope containing the surgical treatment allocation (ASD or DA, ratio 1:1). The allocation was revealed to the surgeon by showing the paper, but not expressed verbally.

The full follow-up process is shown in figure 1. In brief, the participants filled in the above noted (mailed) outcome questionnaires at 3, 6, 12 and 24 months post randomization, in addition to which they were also assessed clinically at 6 and 24 months (and 5 and 10 years) post randomisation by a study physiotherapist unaware of treatment allocation, treatment given or possible unblinding. Outcome assessors were instructed not to inquire anything about prior treatment. Further, participants wore a t-shirt on all follow-up examinations. Data analysis will be done in a blinded manner by the study statistician (JR) not directly involved in the study.

## **STUDY POPULATION**

### **Subject disposition**

Study procedures, including recruitment strategies and inclusion and exclusion criteria, are presented in detail in the accompanying actual study protocol.

## **STATISTICAL ANALYSIS**

Data will be analysed in a blinded manner. All p-values will be reported to 3 decimal places with those less than 0.001 reported as  $p < 0.001$ . The criterion for statistical significance will be set at  $\alpha = 0.05$ .

### **Primary analysis**

The primary analysis will be carried out according to the intention-to-treat (ITT) principle: participants are retained in the groups to which they were initially randomized. The primary comparison on the efficacy of ASD (ASD vs. DA) will be performed as a between-group comparison using a repeated measures mixed-effects model (RMMM). Study group and time of assessment (baseline, 3, 6, 12 and 24 months) will be included as fixed factors and patient as a random factor. The model will include interactions between study group and time of assessment. The baseline value will be included as a covariate. An unstructured covariance structure will be assumed. If the model cannot be fitted, compound symmetry will be assumed instead. The number of degrees of freedom will be assessed using Satterthwaite's method. The RMMM model will be used to quantify the treatment effect as the difference between the groups in pain scores (VAS) with



the associated 95% confidence interval (CI) and p-value at 24 months post-primary randomization. To safeguard against potential multiplicity bias<sup>2</sup>, we will require a statistically significant treatment effect on both of our primary outcome variables, i.e., pain at rest and pain at activity (Table 2).

| <b>Table 2: Primary comparison ASD vs ET: Outcomes of the trial at 24 months follow-up.</b> |                                  |           |                                                              |
|---------------------------------------------------------------------------------------------|----------------------------------|-----------|--------------------------------------------------------------|
|                                                                                             | <b>ASD</b>                       | <b>ET</b> | <b>Between-Group Difference in Improvement from Baseline</b> |
| <b>Primary outcomes</b>                                                                     | <b>Improvement from baseline</b> |           |                                                              |
|                                                                                             | <b>ASD</b>                       | <b>ET</b> |                                                              |
| VAS (rest)                                                                                  |                                  |           |                                                              |
| VAS (at arm activity)                                                                       |                                  |           |                                                              |
| <b>Secondary outcomes</b>                                                                   |                                  |           |                                                              |
| Constant-Murley Score                                                                       |                                  |           |                                                              |
| SST                                                                                         |                                  |           |                                                              |
| SF-36                                                                                       |                                  |           |                                                              |
| 15D                                                                                         |                                  |           |                                                              |
| Time to return to work                                                                      |                                  |           |                                                              |
| Return to previous leisure activities                                                       |                                  |           |                                                              |
| Responder analysis                                                                          |                                  |           |                                                              |
| Patients satisfaction to the treatment                                                      |                                  |           |                                                              |
| Patients assessment of the treatment allocation                                             |                                  |           |                                                              |
| Complications and adverse effects                                                           |                                  |           |                                                              |

Abbreviations: VAS, visual analogue scale; SST, Simple Shoulder Test; SF-36, Short form- 36

The same statistical model will also apply to the pragmatic comparison of the relative benefits of surgical vs. non-operative treatment strategies on SIS (ASD vs. ET) (Table 3).

**Table 3. Secondary comparison ASD vs ET: Outcomes of the trial at 24 months follow-up.**

|                                                 | ASD | ET | Improvement from baseline | Between-Group Difference in Improvement from Baseline |
|-------------------------------------------------|-----|----|---------------------------|-------------------------------------------------------|
|                                                 |     |    |                           |                                                       |
| <b>Primary outcomes</b>                         |     |    | ASD                       | ET                                                    |
| VAS (rest)                                      |     |    |                           |                                                       |
| VAS (at arm activity)                           |     |    |                           |                                                       |
| <b>Secondary outcomes</b>                       |     |    |                           |                                                       |
| Constant-Murley Score                           |     |    |                           |                                                       |
| SST                                             |     |    |                           |                                                       |
| SF-36                                           |     |    |                           |                                                       |
| 15D                                             |     |    |                           |                                                       |
| Time to return to work                          |     |    |                           |                                                       |
| Return to previous leisure activities           |     |    |                           |                                                       |
| Responder analysis                              |     |    |                           |                                                       |
| Patients satisfaction to the treatment          |     |    |                           |                                                       |
| Patients assessment of the treatment allocation |     |    |                           |                                                       |
| Complications and adverse effects               |     |    |                           |                                                       |

Abbreviations: VAS, visual analogue scale; SST, Simple Shoulder Test; SF-36, Short form- 36

### Secondary analyses

We will also use the RMMM model to analyse secondary outcomes (Table 2 and 3) where applicable. The results will be reported as the differences between the groups with the associated 95% confidence interval (CI) and p-value at 24 months post-primary randomization.

Furthermore, instead of focusing only on the statistical significance of the mean differences between treatment groups in the VAS (i.e., the mean improvement from baseline to 24 months), we will also carry out “a responder analysis”. In principle, this analysis allows physicians to inform a

patient of his or her chance of experiencing a clinically meaningful improvement from the treatment, both in absolute terms and in comparison, to a control group. The difference between responders and non-responders can be considered the net-benefit of the treatment. One proposed means to carry out a responder analysis relies on the assessment of the proportion of patients reaching the patient-acceptable symptom state (PASS) and the patient-disappointing symptoms state (PDSS). As no universal consensus exists on either the PASS or the PDSS in the context of SIS, we chose to anchor our responder analysis to the patient's assessment of satisfaction with the shoulder treatment outcome: Patients reporting very satisfied or satisfied will be categorized as "Responders" and those reporting very dissatisfied or dissatisfied as "Non-responders". Given the obvious coarseness of this approach, we plan to evaluate the appropriate criteria for PASS and PDSS in more detail in the future, exploring the potential contribution of, e.g., arm pain at rest and at activity, shoulder function, and night pain.

Categorical variables, the rates of unblinding, reoperation, treatment conversion, complications and adverse effects will be analysed using logistic regression analysis or Poisson regression dependent on whether subjects with complications or (multiple) complications (per subject) are analysed.

These secondary analyses will be supportive, explanatory and/or hypothesis generating, which is why multiplicity is not a problem<sup>2</sup>.

### **Sensitivity analyses**

The following two sensitivity analyses will be carried out: 1) per-protocol analysis, in which the above noted primary analyses will be carried out again with patients who received the interventions as allocated will be redone; 2) and potential effects due to the treatment providing centres.

As all the participants in the ASD group have received the critical therapeutic element (subacromial decompression), no treatment group conversion is possible in this group.

In the per-protocol comparison of the efficacy of ASD (ASD vs. DA), we define the DA per-protocol population as those participants who have not received ASD during the 24-month follow-up (who have not crossed over to ASD).

In the per-protocol comparison of the effectiveness of ASD (ASD vs. ET), we define the ET per-protocol population as those participants who have not received ASD during the 24-month follow-up (who have not crossed over to ASD).

## **INTERPRETATION OF RESULTS**

To safeguard against potential risk of bias during interpretation, a method of “blinded data interpretation” will be used<sup>17</sup>. In brief, an independent statistician will provide the Steering/Writing committee of the FIMPACT trial with blinded results from the analyses with study groups labelled as group A, group B, and group C. This data will be presented to the Steering/Writing Committee, who will then contemplate on the interpretation of the results until a consensus is reached and agree in writing on all alternative interpretations of the findings. Once reaching a consensus, we will record the minutes of this meeting as a statement of interpretation document signed by all members of the Writing Committee. Only after reaching this common agreement will the data manager and independent statistician break the randomization code.

There was also variation in the actual execution of the follow-up assessments, particularly in the earlier time-points (3- and 6-month follow-up visits).

## **IMPLEMENTATION OF ANALYSIS PLAN**

This SAP will be used as a work description for the statistician performing the analyses. All analyses will be performed by the same statistician and none of the investigators involved in this trial will perform any of the statistical analyses.

The implementation of the SAP will be as follows:

1. A ‘data collection form’ will be outlined in a collaboration between the database manager (Leena Caravitis), statistician and principal investigators (Mika Paavola and Teppo Järvinen).
2. The database manager will code each treatment arm into ‘treatment A’, ‘treatment B’ and ‘treatment C’, thus leaving all others blinded to group assignment during the analyses.
3. Blinded data will be delivered to the statistician according to the ‘data collection form’.
4. Primary, secondary and exploratory endpoint analyses will be made blinded to group assignment.
5. Results will be presented to the trial Writing and Steering committee, any uncertainties will be clarified and blinded interpretations of the primary endpoint results will be conducted prior to unblinding of data.

## REFERENCES

1. Tashjian RZ, Deloach J, Porucznik CA, et al. Minimal clinically important differences (MCID) and patient acceptable symptomatic state (PASS) for visual analog scales (VAS) measuring pain in patients treated for rotator cuff disease. *Journal of shoulder and elbow surgery / American Shoulder and Elbow Surgeons* [et al] 2009;**18**(6):927-32.
2. Ranstam J. Multiple P-values and Bonferroni correction. *Osteoarthritis Cartilage* 2016;**24**(5):763-4.
3. Constant CR, Murley AH. A clinical method of functional assessment of the shoulder. *Clinical orthopaedics and related research* 1987(214):160-4.
4. Henseler JF, Kolk A, van der Zwaal P, et al. The minimal detectable change of the Constant score in impingement, full-thickness tears, and massive rotator cuff tears. *Journal of shoulder and elbow surgery / American Shoulder and Elbow Surgeons* [et al] 2015;**24**(3):376-81.
5. Matsen FA, 3rd, Ziegler DW, DeBartolo SE. Patient self-assessment of health status and function in glenohumeral degenerative joint disease. *J Shoulder Elbow Surg* 1995;**4**(5):345-51.
6. Godfrey J, Hamman R, Lowenstein S, et al. Reliability, validity, and responsiveness of the simple shoulder test: psychometric properties by age and injury type. *J Shoulder Elbow Surg* 2007;**16**(3):260-7.
7. Tashjian RZ, Deloach J, Green A, et al. Minimal clinically important differences in ASES and simple shoulder test scores after nonoperative treatment of rotator cuff disease. *J Bone Joint Surg Am* 2010;**92**(2):296-303.
8. Sintonen H. The 15D instrument of health-related quality of life: properties and applications. *Ann Med* 2001;**33**(5):328-36.
9. Moock J, Kohlmann T. Comparing preference-based quality-of-life measures: results from rehabilitation patients with musculoskeletal, cardiovascular, or psychosomatic disorders. *Qual Life Res* 2008;**17**(3):485-95.
10. Bowling A. *Measuring health. A review of quality of life measurement scales*. 3rd ed: Berkshire: Open University Press, 2004.
11. Ware JE, Jr., Sherbourne CD. The MOS 36-item short-form health survey (SF-36). I. Conceptual framework and item selection. *Med Care* 1992;**30**(6):473-83.
12. Garratt A, Schmidt L, Mackintosh A, et al. Quality of life measurement: bibliographic study of patient assessed health outcome measures. *Bmj* 2002;**324**(7351):1417.
13. Hamilton DF, Lane JV, Gaston P, et al. What determines patient satisfaction with surgery? A prospective cohort study of 4709 patients following total joint replacement. *BMJ Open* 2013;**3**(4).
14. Sun X, Ioannidis JP, Agoritsas T, et al. How to use a subgroup analysis: users' guide to the medical literature. *Jama* 2014;**311**(4):405-11.
15. Bigliani LU MD, April EW The morphology of the acromion and its relationship to rotator cuff tears. *Orthop Trans* 1986;**10**:228.
16. Little RJA, Rubin DB. *Statistical Analysis with Missing Data*. New York: John Wiley & Sons, Inc., 1987.
17. Jarvinen TL, Sihvonon R, Bhandari M, et al. Blinded interpretation of study results can feasibly and effectively diminish interpretation bias. *J Clin Epidemiol* 2014;**67**(7):769-72.

## Blinded Data Interpretation Plan

### **Background assumptions regarding our primary comparison (ASD vs. DA)**

- 1) This superiority RCT is designed to address the true *efficacy* of arthroscopic subacromial decompression (ASD), i.e., can ASD theoretically work? Accordingly, we have chosen patients that – based on the existing literature – represent optimal responders to this index surgical procedure.
- 2) Conceding that the act of surgery *per se* produces a profound placebo response, a ‘true’ treatment effect is impossible to disentangle from the nonspecific (placebo or meaning) effects – such as the patients’ or researchers’ expectations of benefit – without a placebo comparison group.
- 3) The only difference between ASD and DA treatment groups is that the subacromial decompression, the critical therapeutic (surgical) element, has been carried out for patients in the ASD group.
  - a. The critical therapeutic (surgical) element is the component of the surgical procedure that is believed to provide the therapeutic effect (here, subacromial decompression), being distinct from aspects of the procedures that are diagnostic or required to access the disease being treated (here, shoulder arthroscopy).
  - b. Apart from the critical therapeutic element, the treatment of the ASD and DA groups is identical, i.e., all “placebo or meaning effect” related to the entire treatment and care is identical.
- 4) To be deemed effective, ASD should provide a statistically significant benefit over DA in both of the two primary outcomes, pain at rest and activity assessed with a visual analog scale (VAS), as determined by the mean VAS difference between the groups. This is to safeguard against potential multiplicity bias<sup>2</sup>.

If ASD is found effective (see above), it should also provide a clinically relevant benefit over DA according to following rationale:

1) There is a proven benefit as follows: Mean VAS-difference between ASD and DA shall exceed the threshold for the minimal clinically important difference (MCID) in VAS. We will consider 15 as the threshold for the minimal clinically important difference (MCID).

AND,

2) There is NO proven harm. If there is a proven benefit of ASD but significantly higher proportion of patients show adverse effects, the amount of benefits will be discussed in relation to the frequency and seriousness of the adverse effects.

### **Statistical commitments:**

- a) I-T-T is the primary data analysis, but per-protocol analysis will also be carried out.
- b) The pre-specified time point of primary interest is 24 months after randomisation.
- c) In addition to the two primary outcome parameters, we will also take into account the number of treatment conversions and re-operations, the incidence and seriousness of adverse effects between the ASD and DA groups, and the responder analysis.

**Based on these theoretical commitments, our interpretation of the findings will be as follows:**

- a) If ASD is found superior to DA, the critical therapeutic element of the ASD procedure (subacromial decompression) has a clinically relevant effect on patients with symptoms consistent with SIS.
- b) If ASD is not found superior to DA, the critical therapeutic element of the ASD procedure (subacromial decompression) does not have a clinically relevant effect on patients with symptoms consistent with SIS. Considering our efficacy design (study participants are ‘optimal responders to ASD’ and the surgeons are highly experienced), such finding would imply that ASD does not work at all.

**Background assumptions regarding our secondary (independent) comparison (ASD vs. ET)**

- 1) This pragmatic comparison is designed to address whether arthroscopic subacromial decompression (ASD) followed by postoperative rehabilitation is superior to supervised progressive exercise therapy (ET). We recognize that in this pragmatic comparison (ASD vs. ET) the supervised progressive exercise therapy regimen carried out in the ET group is different from the postoperative rehabilitation carried out by patients in the ASD group. In addition, the timing of the start of the actual treatment between the ET and ASD groups was somewhat discrepant due to the time required to arrange the surgery. The ASD patients are also subject to some degree of postoperative immobilization, sick-leave, and modification of pain medication and activities, unlike the patients in the ET group, all of which may also have an effect on the treatment outcome. However, these concord with the current best practice recommendations and the two-year follow-up chosen as our primary time point should dilute the effects of somewhat discrepant timing of the interventions.
- 2) To be deemed effective, either ASD or ET should provide a statistically significant benefit over ET or ASD, respectively, in both of our two primary outcomes, pain at rest and activity assessed with a visual analog scale (VAS), as determined by the mean VAS difference between the two treatment groups. This is to safeguard against potential multiplicity bias<sup>2</sup>.
- 3) The following concern (apparent confounding) needs to be taken into account in the interpretation. Despite the thorough *preoperative* screening, 10% (14/136) allocated to the two surgical groups had to be excluded because of pathology found after the 1<sup>st</sup> random allocation. Although this does not have any effect on our primary comparison (ASD vs. DA), the ET and ASD groups are not fully comparable. This discrepancy will possibly skew our results by favouring the ASD group.

Acknowledging all this, if ASD (or ET) is found effective (statistically significant difference in both primary outcomes), it should also provide a clinically relevant benefit over ET (or ASD) according to following rationale:

- 1) There is a proven benefit as follows: Mean VAS-difference between ASD and ET shall exceed the threshold for the minimal clinically important difference (MCID) in VAS. We will consider 15 as the threshold for the minimal clinically important difference (MCID).

AND,

2) There is NO proven harm. If there is a proven benefit of ASD (or ET) but significantly higher proportion of patients show adverse effects, the amount of benefits will be discussed in relation to the frequency and seriousness of the adverse effects.

**Statistical commitments:**

- a) I-T-T is the primary data analysis, but per-protocol analysis will also be carried out.
- b) The pre-specified time point of primary interest is 24 months after randomisation.
- c) In addition to the two primary outcome parameters, we will also take into account the number of treatment conversions and re-operations, the incidence and seriousness of adverse effects between the ASD and ET groups, and the responder analysis.
- d) Given the Background assumption 3.a) (above, the discrepant number of patients with a shoulder pathology other than SIS), we will carry out a worst-case analysis by creating a subgroup of the ET group by removing seven (an equal number of patients excluded from both surgical treatment arms due to pathology found after 1<sup>st</sup> randomization) worst-cases/highest VAS-pain scores at the primary analysis time-point (24 months). The number of removed cases is based on the assumption that the prevalence of shoulder pathology is identical in the randomized population, while the decision to remove the individual with the highest VAS-pain scores at the end of the study basis on the assumption that shoulder pathology is an effect-modifying factor, predicting poor outcome.

**Based on these theoretical commitments, our interpretation of the findings will be as follows:**

- a) If ASD is found superior to ET in both the complete case and the sensitivity (subgroup) analyses, ASD is a more effective treatment option than ET for patients with SIS.
- b) If ET is found superior to ASD in both the complete case and the sensitivity (subgroup) analyses, our results suggests that ET is a more effective treatment option than ASD for patients with subacromial pain syndrome.
- c) If there are no statistically significant differences between ASD and ET, ASD and ET are equally effective.
